# Supplementary material for: Metal-Free Carbon Quantum Dots Implant Graphitic Carbon Nitride: Enhanced Photocatalytic Dye Wastewater Purification with Simultaneous Hydrogen Production
Source: PubMed Central journal article supplement (PMC7036787; doi:10.3390/ijms21031052), 2020-02-05
Supplement: ijms-21-01052-s001.pdf [file ijms-21-01052-s001.pdf]

## Supporting Information

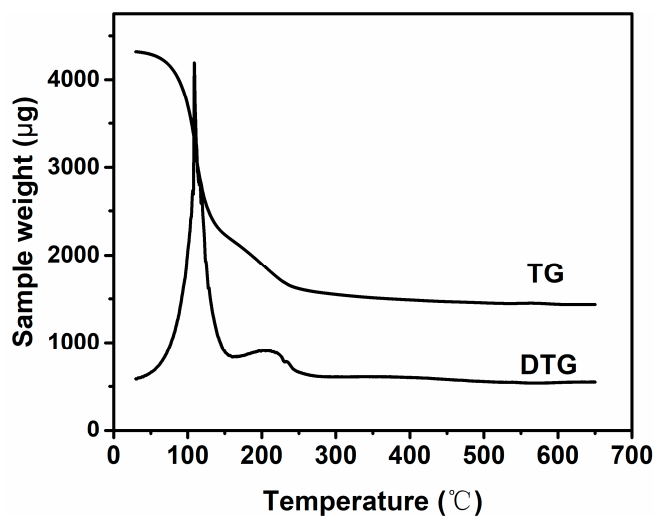

Figure S1. TG and DTG profiles of the synthesized CQDs at heating rate of 15 °C/min under Nitrogen. The two apparent weightless peaks at 110 °C and 200 °C were attributed to the volatilization of the solvent adsorbed on the CQD surface. No visible weightless peak was found above 400 °C, indicating that pure CQDs were stable under the experimental conditions.

Table S1 CN and CCN CQD content and BET surface

| CCN                                  | C:N ratio | CQD contents | BET surface m <sup>2</sup> /g |
|--------------------------------------|-----------|--------------|-------------------------------|
| Bulk g-C <sub>3</sub> N <sub>4</sub> | 0.75      | 0            | 73.4                          |
| CN                                   | 0.75      | 0            | 92.8                          |
| 1CCN                                 | 0.753     | 0.16         | 88.0                          |
| 2CCN                                 | 0.757     | 0.36         | 83.7                          |
| 3CCN                                 | 0.765     | 0.78         | 77.7                          |
| 4CCN                                 | 0.769     | 0.98         | 87.1                          |
| 5CCN                                 | 0.776     | 1.34         | 84.8                          |
| 6CCN                                 | 0.783     | 1.69         | 82.5                          |

$$CQD \text{ content} = \frac{12 \times (CN \text{ ratio} - 0.75)}{12 \times CN \text{ ratio} + 14}$$
